# Supplementary material for: Seroprevalence and Shifting Endemicities of Hepatitis A Virus Infection in Two Different Geographical Areas in the Philippines
Source: Springer Nature journal article supplement (doi:10.1007/s40121-024-00955-w), 2024-04-05
Supplement: MOESM1 [file 26948326]

# **Seroprevalence and Shifting Endemicities of Hepatitis A Virus Infection in Two Different Geographical Areas in Philippines**

**Authors:** Josefina C. Carlos<sup>1</sup>, Vinna Marie T. Quinones<sup>1</sup>, Maria Peñafrancia L. Adversario<sup>1</sup>, Jennifer M. Nailes<sup>1</sup>, Jangail C. Songco<sup>1</sup>, Donaliz R. Garcia,<sup>1</sup> Michelle G. Cacayorin<sup>1</sup>, May Priscilla V. Cero<sup>1</sup>, Ma. Paula Aleta Benedicto-Delfin<sup>1</sup>, Ma. Christina C. Blanco<sup>1</sup>, Nadjah S. Natividad<sup>1</sup>, Jacqueline D. Bernabe<sup>1</sup>, Hyacinth Claire T. Chacon<sup>1</sup>, Ronald Alvin C. Ascue<sup>1</sup>, Jayme Natasha K. Paggao<sup>1</sup>, Lous Ohsana P. Comendador<sup>1</sup>, Gustavo Hernandez-Suarez<sup>2</sup>, Adriana Guzman-Holst<sup>2</sup>

**Affiliations:**

<sup>1</sup> University of the East Ramon Magsaysay Memorial Medical Center, Quezon City, Philippines

<sup>2</sup> GSK, Wavre, Belgium

**Corresponding author:** Adriana Guzman Holst, GSK, 20 Avenue Fleming, 1300, Wavre, Belgium; +32 479 82 24 22; [adriana.x.guzman@gsk.com](mailto:adriana.x.guzman@gsk.com)

**Inclusion criteria**

1. Between 1–80 years of age.
2. Willing to participate and provide informed consent (and attestation for minors according to local good research practices) by participant or parent and/ or legal guardian for children.
3. Being resident (living during the last 6 months) in the selected geographic area.

**Exclusion criteria**

1. Children in care.
2. Receipt of immune globulins, blood or blood-derived products in last 3 months.
3. Bleeding disorder, or receipt of anticoagulants in the 3 weeks preceding inclusion, contraindicating blood drawing.
4. Attending to a health care institution due to gastrointestinal symptoms or icterical in the last 8 weeks.
5. Individuals diagnosed immunodeficiency condition.
6. Individuals diagnosed with terminal or psychiatric illness.
7. Child, parent or other family member living the same household already enrolled as participant in this study.

**Table S1**      **Cities included in the recruitment/enrollment process for participants from urban regions**

| <b>City</b>      |
|------------------|
| Antipolo         |
| Bulacan          |
| Caloocan City    |
| Cavite City      |
| Makati City      |
| Malabon City     |
| Mandaluyong City |
| Montalban        |
| Navotas City     |
| Pasig City       |
| Quezon City      |
| San Juan City    |
| Tanay            |

**Table S2**      **Theoretical sample size by age group**

| <b>Age group, in years</b> | <b>Expected HAV seroprevalence prevalence</b> | <b>Sample size needed n=</b> | <b>Safe margin of error n=</b> |
|----------------------------|-----------------------------------------------|------------------------------|--------------------------------|
| 1–2                        | 0.1                                           | 50                           | 55                             |
| 3–4                        | 0.1                                           | 25                           | 55                             |
| 5-9                        | 0.2                                           | 44                           | 50                             |
| 10–14                      | 0.2                                           | 44                           | 50                             |
| 15–19                      | 0.4                                           | 65                           | 70                             |
| 20–24                      | 0.5                                           | 68                           | 75                             |
| 25–29                      | 0.5                                           | 68                           | 75                             |
| 30–34                      | 0.7                                           | 57                           | 65                             |

|              |     |            |            |
|--------------|-----|------------|------------|
| 35–39        | 0.7 | 57         | 65         |
| 40–49        | 0.8 | 44         | 50         |
| 50+          | 0.9 | 25         | 30         |
| <b>Total</b> |     | <b>572</b> | <b>640</b> |

HAV: hepatitis A virus

**Table S3 Comparison of past medical history factors between urban and rural areas**

| <b>Past medical history of hepatitis</b>                        | <b>Urban<br/>N (%)</b> | <b>Rural<br/>N (%)</b> | <b>p-value</b> |
|-----------------------------------------------------------------|------------------------|------------------------|----------------|
| <b>Ever diagnosed with hepatitis disease</b>                    |                        |                        |                |
| Yes                                                             | 8 (1.3)                | 5 (0.8)                | 0.6332*        |
| No                                                              | 587 (97.5)             | 628 (98.1)             |                |
| Don't know                                                      | 7 (1.2)                | 7 (1.1)                |                |
| <b>Type of hepatitis disease</b>                                |                        |                        |                |
| Hepatitis A                                                     | 1                      | -                      | NA             |
| Hepatitis B                                                     | 4                      | 1                      |                |
| No response/Don't know                                          | 3                      | 4                      |                |
| <b>Living in the same household as today</b>                    |                        |                        |                |
| Yes                                                             | 2                      | 1                      | NA             |
| No                                                              | 3                      | 1                      |                |
| No response                                                     | 3                      | 3                      |                |
| <b>Area of residence of the household when one got infected</b> |                        |                        |                |
| Urban                                                           | 5                      | 1                      | NA             |
| Rural                                                           | -                      | 1                      |                |
| <b>Lived the most during first 5 years in current area</b>      |                        |                        |                |
| Yes                                                             | 506 (84.0)             | 596 (93.1)             | <0.0001*       |
| No                                                              | 96 (16.0)              | 36 (5.6)               |                |

| <b>Past medical history of hepatitis</b>                 | <b>Urban<br/>N (%)</b> | <b>Rural<br/>N (%)</b> | <b>p-value</b> |
|----------------------------------------------------------|------------------------|------------------------|----------------|
| No answer                                                | -                      | 8 (1.3%)               |                |
| <b>Area of residence at that time</b>                    |                        |                        |                |
| Urban                                                    | 568 (94.4)             | 6 (0.9)                | NA             |
| Rural                                                    | 34 (5.6)               | 626 (97.8)             |                |
| No response                                              | -                      | 8 (1.3%)               |                |
| <b>Family with jaundice and fever in the past</b>        |                        |                        |                |
| Yes                                                      | 21 (3.5)               | 10 (1.6)               | 0.0300*        |
| No                                                       | 581 (96.5)             | 629 (98.3)             |                |
| No response                                              |                        | 1 (0.1%)               |                |
| <b>Family member affected</b>                            |                        |                        |                |
| Husband                                                  | -                      | 1                      | NA             |
| Father                                                   | 7                      | -                      |                |
| Mother                                                   | 2                      | -                      |                |
| Sibling                                                  | 6                      | 6                      |                |
| Grandfather                                              | 1                      | -                      |                |
| Grandmother                                              | 1                      | -                      |                |
| Aunt                                                     | 1                      | -                      |                |
| Cousin                                                   | 2                      | -                      |                |
| Nephew                                                   | 1                      | -                      |                |
| Unspecified                                              | -                      | 3                      |                |
| <b>Vaccinated against hepatitis A</b>                    |                        |                        |                |
| Yes                                                      | 102 (16.9)             | 2 (0.3)                | <0.0001*       |
| No                                                       | 500 (83.1)             | 638 (99.7)             |                |
| <b>Confirmed vaccinated by checking vaccination card</b> |                        |                        |                |
| Yes                                                      | 25 (24.5)              | 1 (50.0)               | 0.8786 †       |

| <b>Past medical history of hepatitis</b> | <b>Urban<br/>N (%)</b> | <b>Rural<br/>N (%)</b> | <b>p-value</b> |
|------------------------------------------|------------------------|------------------------|----------------|
| No                                       | 77 (75.5)              | 1 (50.0)               |                |

NA: not applicable

\*Chi square test

† Fishers exact test

**Table S4 Comparison of water safety access factors between urban and rural areas**

| <b>Features of water safety access</b>                                                                                    | <b>Urban<br/>N (%)</b> | <b>Rural<br/>N (%)</b> | <b>p-value</b> |
|---------------------------------------------------------------------------------------------------------------------------|------------------------|------------------------|----------------|
| <b>Main source of drinking water for household members</b>                                                                |                        |                        |                |
| Piped water into dwelling                                                                                                 | 109 (18.1)             | 38 (5.9)               |                |
| Piped water to yard/plot                                                                                                  | -                      | 14 (2.2)               |                |
| Public tap/standpipe                                                                                                      | 3 (0.5)                | 69 (10.8)              |                |
| Tubewell/bore-hole                                                                                                        | -                      | 197 (30.8)             |                |
| Protected dug well                                                                                                        | -                      | 62 (9.7)               |                |
| Unprotected dug well                                                                                                      | -                      | 2 (0.3)                |                |
| Protected spring                                                                                                          | -                      | 20 (3.1)               |                |
| Unprotected spring                                                                                                        | -                      | 15 (2.3)               |                |
| Bottled water                                                                                                             | 489 (81.2)             | 220 (34.4)             |                |
| Surface water (river, dam, lake, pond, stream, canal, irrigation channels)                                                | -                      | 3 (0.5)                |                |
| Other, unspecified                                                                                                        | 1 (0.2)                | -                      |                |
| <b>Main source of drinking water for household members</b>                                                                |                        |                        |                |
| Improved                                                                                                                  | 601 (100)              | 620 (96.9)             | <0.0001*       |
| Unimproved                                                                                                                | 0                      | 20 (3.1)               |                |
| <b>Main source of water used by household for other purposes (if bottled water was the main source of drinking water)</b> |                        |                        |                |

| <b>Features of water safety access</b>                                                                                | <b>Urban<br/>N (%)</b> | <b>Rural<br/>N (%)</b> | <b>p-value</b>       |
|-----------------------------------------------------------------------------------------------------------------------|------------------------|------------------------|----------------------|
| Piped water into dwelling                                                                                             | 478 (97.8)             | 54 (24.7)              |                      |
| Piped water to yard/plot                                                                                              | 1 (0.2)                | 3 (1.4)                |                      |
| Public tap/standpipe                                                                                                  | 2 (0.4)                | 33 (15.1)              |                      |
| Tube well/bore-hole                                                                                                   | -                      | 95 (43.4)              |                      |
| Protected dug well                                                                                                    | 3 (0.6)                | 27 (12.3)              |                      |
| Protected spring                                                                                                      | -                      | 3 (1.4)                |                      |
| Unprotected spring                                                                                                    | -                      | 1 (0.5)                |                      |
| Bottled water                                                                                                         | 5 (1.0)                | 1 (0.5)                |                      |
| Surface water                                                                                                         | -                      | 2 (0.9)                |                      |
| <b>Main source of water used by household for other purposes (if bottled water was main source of drinking water)</b> |                        |                        |                      |
| Improved                                                                                                              | 489 (100)              | 216 (98.6)             | 0.0094 <sup>‡</sup>  |
| Unimproved                                                                                                            | -                      | 3 (1.4)                |                      |
| <b>Length of time to get water and come back in minutes; mean (SD)</b>                                                | 0.3 (1.5)              | 7.2 (14.3)             | <0.0001 <sup>†</sup> |
| <b>Treat water</b>                                                                                                    |                        |                        |                      |
| Yes                                                                                                                   | 178 (29.6)             | 268 (41.9)             | <0.0001*             |
| No                                                                                                                    | 424 (70.4)             | 372 (58.1)             |                      |
| <b>Safe drinking water practices</b>                                                                                  |                        |                        |                      |
| Boil                                                                                                                  | 110 (61.8)             | 197 (73.8)             |                      |
| Add bleach/chlorine                                                                                                   | -                      | -                      |                      |
| Strain it through a cloth                                                                                             | 7 (3.9)                | 49 (18.3)              |                      |
| Use a water filter (ceramic, sand, composite, etc.)                                                                   | 66 (37.1)              | 4 (1.5)                |                      |
| Solar disinfection                                                                                                    | 1 (0.6)                | 2 (0.8)                |                      |
| Let it stand and settle                                                                                               | 2 (1.1)                | 70 (26.1)              |                      |
| Other (cooling, water purification tablets)                                                                           | 2 (1.1)                | -                      |                      |

| <b>Features of water safety access</b>                                                                     | <b>Urban<br/>N (%)</b> | <b>Rural<br/>N (%)</b> | <b>p-value</b> |
|------------------------------------------------------------------------------------------------------------|------------------------|------------------------|----------------|
| Don't know                                                                                                 | 1 (0.6)                | -                      |                |
| <b>Type of toilet facility</b>                                                                             |                        |                        |                |
| Flush                                                                                                      | 208 (34.6)             | 20 (3.1)               | <0.0001*       |
| Pour-flush                                                                                                 | 394 (65.4)             | 619 (96.9)             |                |
| No toilet                                                                                                  |                        | 1                      |                |
| <b>Where does it flush/pour-flush?</b>                                                                     |                        |                        |                |
| Piped water system                                                                                         | 78 (13.0)              | -                      |                |
| Septic tank                                                                                                | 497 (82.6)             | 592 (92.8)             |                |
| Elsewhere                                                                                                  | 1 (0.2)                | -                      |                |
| Unknown place/not sure                                                                                     | 24 (3.9)               | -                      |                |
| Ventilated improve out latrine                                                                             | -                      | 2 (0.3)                |                |
| Pit latrine with slab (/closed pit)                                                                        | -                      | 2 (0.3)                |                |
| Pit latrine without slab/open pit                                                                          | -                      | 1 (0.2)                |                |
| No facilities or bush or field (river)                                                                     | 2 (0.3)                | 7 (1.1)                |                |
| Other (sewage canal, drainage canal, open canal, common/ common drainage, dug hole, household sewage tank) | -                      | 35 (5.5)               |                |
| No response                                                                                                | -                      | 2                      |                |
| <b>Where does it flush/pour?</b>                                                                           |                        |                        |                |
| Improved                                                                                                   | 600 (99.7)             | 602 (94.4)             | <0.0001*       |
| Unimproved                                                                                                 | 2 (0.3)                | 36 (5.6)               |                |

SD: standard deviation

\* Chi square test

‡ Fishers exact test

† Independent t-test



**Table S5 Comparison of hygienic food intake factors between urban and rural areas**

| Hygiene food intake practices          | Urban<br>N (%) | Rural<br>N (%) | p-value* |
|----------------------------------------|----------------|----------------|----------|
| <b>Where food is prepared at home</b>  |                |                |          |
| On the ground                          | 10 (1.7)       | 49 (7.7)       | <0.0001  |
| Multi-purpose table                    | 119 (19.8)     | 303 (47.3)     |          |
| Table exclusively set for cooking      | 473 (78.5)     | 288 (45.0)     |          |
| <b>Get main meals from home</b>        |                |                |          |
| Never                                  | 14 (2.3)       | 2 (0.3)        | 0.0002   |
| Sometimes                              | 92 (15.3)      | 123 (19.2)     |          |
| Most of the time                       | 261 (43.4)     | 229 (35.8)     |          |
| Always                                 | 235 (39.0)     | 286 (44.7)     |          |
| <b>Get main meals from street</b>      |                |                |          |
| Never                                  | 135 (22.4)     | 94 (14.7)      | 0.0020   |
| Sometimes                              | 379 (63.0)     | 445 (69.5)     |          |
| Most of the time                       | 66 (11.0)      | 85 (13.3)      |          |
| Always                                 | 22 (3.6)       | 16 (2.5)       |          |
| <b>Wash hands before handling food</b> |                |                |          |
| Never                                  | 1 (0.2)        | 3 (0.5)        | <0.0001  |
| Sometimes                              | 18 (3.0)       | 55 (8.6)       |          |
| Most of the time                       | 68 (11.3)      | 144 (22.5)     |          |
| Always                                 | 515 (85.5)     | 438 (68.4)     |          |
| <b>Wash hands before eating food</b>   |                |                |          |
| Never                                  | 3 (0.5)        | 2 (0.3)        | 0.0009   |
| Sometimes                              | 17 (2.8)       | 29 (4.5)       |          |
| Most of the time                       | 73 (12.1)      | 122 (19.1)     |          |
| Always                                 | 509 (84.6)     | 487 (76.1)     |          |

| <b>Hygiene food intake practices</b>                               | <b>Urban<br/>N (%)</b> | <b>Rural<br/>N (%)</b> | <b>p-value*</b> |
|--------------------------------------------------------------------|------------------------|------------------------|-----------------|
| <b>Wash hands after defecation</b>                                 |                        |                        |                 |
| Never                                                              | -                      | -                      | 0.0198          |
| Sometimes                                                          | 4 (0.7)                | 3 (0.5)                |                 |
| Most of the time                                                   | 32 (5.3)               | 58 (9.1)               |                 |
| Always                                                             | 566 (94.0)             | 579 (90.5)             |                 |
| <b>Kitchen where food was prepared free of insects and rodents</b> |                        |                        |                 |
| Never                                                              | 65 (10.8)              | 66 (10.3)              | <0.0001         |
| Sometimes                                                          | 127 (21.1)             | 290 (45.4)             |                 |
| Most of the time                                                   | 216 (35.9)             | 171 (26.8)             |                 |
| Always                                                             | 194 (32.2)             | 112 (17.5)             |                 |

\* Chi square test

**Table S6 Comparison of knowledge factors on HAV disease between urban and rural areas**

| <b>Attributes of knowledge</b>      | <b>Urban<br/>N (%)</b> | <b>Rural<br/>N (%)</b> | <b>p-value*</b> |
|-------------------------------------|------------------------|------------------------|-----------------|
| <b>Have heard about the disease</b> |                        |                        |                 |
| Yes                                 | 485 (80.6)             | 294 (45.9)             | <0.0001         |
| No                                  | 117 (19.4)             | 346 (54.1)             |                 |
| <b>Kind of disease</b>              |                        |                        |                 |
| Communicable                        | 275 (56.7)             | 130 (44.2)             | 0.0033          |
| Non-communicable                    | 116 (23.9)             | 91 (31.0)              |                 |
| Do not know                         | 94 (19.4)              | 73 (24.8)              |                 |
| <b>Main way of transmission</b>     |                        |                        |                 |
| By blood                            | 86 (17.9)              | 43 (14.7)              | 0.6718          |
| By air                              | 14 (2.9)               | 12 (4.1)               |                 |

| <b>Attributes of knowledge</b>                                     | <b>Urban<br/>N (%)</b> | <b>Rural<br/>N (%)</b> | <b>p-value*</b> |
|--------------------------------------------------------------------|------------------------|------------------------|-----------------|
| Sexually transmitted                                               | 19 (4.0)               | 12 (4.1)               |                 |
| By contaminated food/water                                         | 350 (72.9)             | 216 (74.0)             |                 |
| By mosquito bites                                                  | 11 (2.3)               | 9 (3.1)                |                 |
| <b>Vaccine to prevent hepatitis A available in the Philippines</b> |                        |                        |                 |
| Yes                                                                | 219 (45.2)             | 136 (46.3)             | 0.0032          |
| No                                                                 | 75 (15.4)              | 70 (23.8)              |                 |
| Do not know                                                        | 191 (39.4)             | 88 (29.9)              |                 |
| <b>Possible risk factor/s</b>                                      |                        |                        |                 |
| Use unclean toilets                                                | 300 (61.9)             | 224 (76.2)             | <0.0001         |
| Consume contaminated water/food                                    | 446 (92.0)             | 281 (95.6)             | 0.0498          |
| Taking to ill                                                      | 180 (37.1)             | 142 (48.3)             | 0.0021          |
| Sharing a room with an infected individual                         | 217 (44.7)             | 144 (49.0)             | 0.2511          |
| <b>Possible symptoms of hepatitis A</b>                            |                        |                        |                 |
| Yellowish discoloration of the eyes                                |                        |                        | 0.7603          |
| Yes                                                                | 455 (93.8)             | 272 (92.5)             |                 |
| No                                                                 | 20 (4.1)               | 14 (4.8)               |                 |
| Don't know                                                         | 10 (2.1)               | 8 (2.7)                |                 |
| Abdominal pain                                                     |                        |                        | <0.0001         |
| Yes                                                                | 384 (79.2)             | 184 (62.6)             |                 |
| No                                                                 | 51 (10.5)              | 59 (20.1)              |                 |
| Don't know                                                         | 50 (10.3)              | 51 (17.3)              |                 |
| Nasal bleeding                                                     |                        |                        | 0.2883          |
| Yes                                                                | 126 (26.0)             | 73 (24.8)              |                 |
| No                                                                 | 196 (40.4)             | 135 (45.9)             |                 |
| Don't know                                                         | 163 (33.6)             | 86 (29.3)              |                 |

| <b>Attributes of knowledge</b> | <b>Urban<br/>N (%)</b> | <b>Rural<br/>N (%)</b> | <b>p-value*</b> |
|--------------------------------|------------------------|------------------------|-----------------|
| Dark tea color urine           |                        |                        | 0.0031          |
| Yes                            | 302 (62.3)             | 155 (52.7)             |                 |
| No                             | 76 (15.7)              | 74 (25.2)              |                 |
| Don't know                     | 107 (22.1)             | 65 (22.1)              |                 |
| Numbness over the extremities  |                        |                        | <0.0001         |
| Yes                            | 119 (24.5)             | 124 (42.2)             |                 |
| No                             | 175 (36.1)             | 82 (27.9)              |                 |
| Don't know                     | 191 (39.4)             | 88 (29.9)              |                 |
| Fever                          |                        |                        | 0.5130          |
| Yes                            | 406 (83.7)             | 255 (86.7)             |                 |
| No                             | 46 (9.5)               | 22 (7.5)               |                 |
| Don't know                     | 33 (6.8)               | 17 (5.8)               |                 |
| Pale stools                    |                        |                        | 0.6753          |
| Yes                            | 215 (44.3)             | 127 (43.2)             |                 |
| No                             | 104 (21.4)             | 71 (24.2)              |                 |
| Don't know                     | 166 (34.2)             | 96 (32.6)              |                 |

HAV: hepatitis A virus

\* Chi square test

## Questionnaire

### Section A. Sociodemographics

Please use a circle to mark the answer given by the participant/parent

|           |                                                                                                                                                                                                                                                                                                                                                                                                                                            |
|-----------|--------------------------------------------------------------------------------------------------------------------------------------------------------------------------------------------------------------------------------------------------------------------------------------------------------------------------------------------------------------------------------------------------------------------------------------------|
| <b>A1</b> | Education of 12+ participant:<br>1. Primary School (6years)<br>2. Middle School (9 years)<br>3. High School (13 years)<br>4. Graduate/post-graduate (16+ years)<br>5. Illiterate<br>6. <6y ( for participants <12y age)                                                                                                                                                                                                                    |
| <b>A2</b> | Occupation of participant:<br>1. Professional                      2. Semi-professional                      3. Clerical/shop owner<br>4. Skilled worker                      5. Semi-skilled worker                      6. Unskilled worker<br>7. Household duties                      8. Unemployed (adults)                      9. Attending School<br>10. Attending Garderie/Pre-School                      11. At home (children) |
| <b>A3</b> | For all participants, What was the highest education attained from you parents of parents choose the option number as mentioned in A1<br>(a) Education of Father: 1-      2-      3-      4-      5-      6-<br>(b) Education of Mother: 1-      2-      3-      4-      5-      6-                                                                                                                                                        |
| <b>A4</b> | Total number of family members living in the same household: _____                                                                                                                                                                                                                                                                                                                                                                         |
| <b>A5</b> | <i>Total family monthly income _____<br/>(local currency, please consider to include multiple selection accordingly to local scenario:</i>                                                                                                                                                                                                                                                                                                 |
| <b>A6</b> | Regarding your households walls roof and floor are made of (please choose one)<br><input type="radio"/> Permanent building materials are used for walls, roof and floor<br><input type="radio"/> Natural/Traditional/ Rudimentary materials                                                                                                                                                                                                |
| <b>A7</b> | Do you have at home (you can tick more than one option)<br><input type="radio"/> Fridge/Refrigerator<br><input type="radio"/> Bank account<br><input type="radio"/> Iron<br><input type="radio"/> Desktop/laptop<br><input type="radio"/> Radio<br><input type="radio"/> Sofa<br><input type="radio"/> Sewing machine                                                                                                                      |
| <b>A8</b> | How many habitable rooms your household has? _____                                                                                                                                                                                                                                                                                                                                                                                         |

**Section B. Knowledge of disease**

(Participants 14+ **should answer by themselves** these Section of question in not otherwise specified)

|           |                                                                                                               |                                                                                                                                                                                                                 |                         |
|-----------|---------------------------------------------------------------------------------------------------------------|-----------------------------------------------------------------------------------------------------------------------------------------------------------------------------------------------------------------|-------------------------|
| <b>B1</b> | Have you heard about a disease called Hepatitis A before?<br>(If the answer is "No" then go to the Section C) | 1. Yes                                                                                                                                                                                                          | 2. No                   |
| <b>B2</b> | What kind of a disease is it?                                                                                 | 1.Communicable<br>2.Non-Communicable<br>3. Do not know                                                                                                                                                          |                         |
| <b>B3</b> | What is the main way of transmission?                                                                         | 1. By blood<br>2. By air<br>3. Sexually Transmitted<br>4. By contaminated food/water<br>5. By mosquito bite                                                                                                     |                         |
| <b>B4</b> | Is there a vaccine to prevent Hepatitis A available in _____(Name of country)_____?                           | 1. Yes                                                                                                                                                                                                          | 2. No<br>3. Do not know |
| <b>B5</b> | What are the possible risk factor/ factors?<br>(Multiple answers are allowed)                                 | <input type="radio"/> Use unclean toilets<br><input type="radio"/> Consume contaminated water/ food<br><input type="radio"/> Talking to ill<br><input type="radio"/> Sharing a room with an infected individual |                         |
| <b>B6</b> | _____What are the possible symptoms of Hepatitis A?                                                           |                                                                                                                                                                                                                 |                         |
|           | a. Yellowish discoloration of eyes                                                                            | Yes                                                                                                                                                                                                             | No                      |
|           | b. Abdominal pain                                                                                             | Yes                                                                                                                                                                                                             | No                      |
|           | c. Nasal bleeding                                                                                             | Yes                                                                                                                                                                                                             | No                      |
|           | d. Dark tea colour urine                                                                                      | Yes                                                                                                                                                                                                             | No                      |
|           | e. Numbness over extremities                                                                                  | Yes                                                                                                                                                                                                             | No                      |
|           | f. Fever                                                                                                      | Yes                                                                                                                                                                                                             | No                      |
|           | g. Pale stools                                                                                                | Yes                                                                                                                                                                                                             | No                      |

### Section C. Past Medical History of Hepatitis

(participants 14+ can answer this section questions with the assistance of their guardian)

|            |                                                                                                                                                                                               |
|------------|-----------------------------------------------------------------------------------------------------------------------------------------------------------------------------------------------|
| <b>C1</b>  | Have you (your child) ever been diagnosed with Hepatitis Disease? 1. Yes 2. No 3. DK                                                                                                          |
| <b>C1a</b> | (a) If Yes, what type? _____, if No go to Question C2<br>(Write the answer provided, if the answer is Don't Know, write down DK)                                                              |
| <b>C1b</b> | (b) if Yes, were you living in the same household as today? 1. Yes 2. No                                                                                                                      |
| <b>C1c</b> | (c) if No to the last question, where were you living? (Village Name) _____                                                                                                                   |
| <b>C1d</b> | (d) What was the Area of Residence of your household when got infected? 1. Urban 2. Rural                                                                                                     |
| <b>C2a</b> | (a) Did you (your child) live the most during your first 5 years of life in the current village? 1. Yes 2. No                                                                                 |
| <b>C2b</b> | (b) What was the Area of Residence of your household at that time: 1. Urban 2. Rural                                                                                                          |
| <b>C3a</b> | Has anyone in your family got jaundice with fever in the past? 1. Yes 2. No                                                                                                                   |
| <b>C3b</b> | (a) If yes, who? _____ (mother /father/siblings /others (specify))<br>(b) When (at least the year of occurrence. If more than one member affected record the earliest reported date)? MM/YEAR |
| <b>C4a</b> | Have you ever been vaccinated against Hepatitis A? 1. Yes 2. No                                                                                                                               |
| <b>C4b</b> | Confirm the answer by checking vaccination card?? 1. Yes 2. No                                                                                                                                |

### Section D . Drinking Water Safety

(participants 14+ can answer this section questions with the assistance of their guardian)

|                              |                                                                                                                                                                                                                                                                                                                                                                                                                                                                                                                                                                                                                                                                                                                                                                                                                                                                              |                                                                                |                         |                               |                             |                     |                  |                          |                       |                                                                                |                        |                         |  |                       |                    |                           |
|------------------------------|------------------------------------------------------------------------------------------------------------------------------------------------------------------------------------------------------------------------------------------------------------------------------------------------------------------------------------------------------------------------------------------------------------------------------------------------------------------------------------------------------------------------------------------------------------------------------------------------------------------------------------------------------------------------------------------------------------------------------------------------------------------------------------------------------------------------------------------------------------------------------|--------------------------------------------------------------------------------|-------------------------|-------------------------------|-----------------------------|---------------------|------------------|--------------------------|-----------------------|--------------------------------------------------------------------------------|------------------------|-------------------------|--|-----------------------|--------------------|---------------------------|
| <b>D1</b>                    | <p>What is the main source of drinking-water for members of your household?</p> <table style="width: 100%; border: none;"> <tr> <td style="width: 33%;">1. Piped water into dwelling</td> <td style="width: 33%;">6. Unprotected dug well</td> <td style="width: 33%;">11. Cart with small tank/drum</td> </tr> <tr> <td>2. Piped water to yard/plot</td> <td>7. Protected spring</td> <td>12. Tanker-truck</td> </tr> <tr> <td>3. Public tap/ standpipe</td> <td>8. Unprotected spring</td> <td>13. Surface water (river, dam, lake, pond, stream, canal, irrigation channels)</td> </tr> <tr> <td>4. Tubewell/ bore-hole</td> <td>9. Rainwater collection</td> <td></td> </tr> <tr> <td>5. Protected dug well</td> <td>10. Bottled water*</td> <td>14. Other (specify) _____</td> </tr> </table> <p>*If answer is #10 , go to the next question, otherwise your to #12</p> | 1. Piped water into dwelling                                                   | 6. Unprotected dug well | 11. Cart with small tank/drum | 2. Piped water to yard/plot | 7. Protected spring | 12. Tanker-truck | 3. Public tap/ standpipe | 8. Unprotected spring | 13. Surface water (river, dam, lake, pond, stream, canal, irrigation channels) | 4. Tubewell/ bore-hole | 9. Rainwater collection |  | 5. Protected dug well | 10. Bottled water* | 14. Other (specify) _____ |
| 1. Piped water into dwelling | 6. Unprotected dug well                                                                                                                                                                                                                                                                                                                                                                                                                                                                                                                                                                                                                                                                                                                                                                                                                                                      | 11. Cart with small tank/drum                                                  |                         |                               |                             |                     |                  |                          |                       |                                                                                |                        |                         |  |                       |                    |                           |
| 2. Piped water to yard/plot  | 7. Protected spring                                                                                                                                                                                                                                                                                                                                                                                                                                                                                                                                                                                                                                                                                                                                                                                                                                                          | 12. Tanker-truck                                                               |                         |                               |                             |                     |                  |                          |                       |                                                                                |                        |                         |  |                       |                    |                           |
| 3. Public tap/ standpipe     | 8. Unprotected spring                                                                                                                                                                                                                                                                                                                                                                                                                                                                                                                                                                                                                                                                                                                                                                                                                                                        | 13. Surface water (river, dam, lake, pond, stream, canal, irrigation channels) |                         |                               |                             |                     |                  |                          |                       |                                                                                |                        |                         |  |                       |                    |                           |
| 4. Tubewell/ bore-hole       | 9. Rainwater collection                                                                                                                                                                                                                                                                                                                                                                                                                                                                                                                                                                                                                                                                                                                                                                                                                                                      |                                                                                |                         |                               |                             |                     |                  |                          |                       |                                                                                |                        |                         |  |                       |                    |                           |
| 5. Protected dug well        | 10. Bottled water*                                                                                                                                                                                                                                                                                                                                                                                                                                                                                                                                                                                                                                                                                                                                                                                                                                                           | 14. Other (specify) _____                                                      |                         |                               |                             |                     |                  |                          |                       |                                                                                |                        |                         |  |                       |                    |                           |
| <b>D2</b>                    | <p>You indicated that bottled water was your main source of drinking water, now I will like to ask you what is the main source of water used by your household <b>for other purposes, such as cooking and hand washing?</b></p> <table style="width: 100%; border: none;"> <tr> <td style="width: 33%;">1. Piped water into dwelling</td> <td style="width: 33%;">6. Unprotected dug well</td> <td style="width: 33%;">11. Cart with small tank/drum</td> </tr> <tr> <td></td> <td>7. Protected spring</td> <td>12. Tanker-truck</td> </tr> </table>                                                                                                                                                                                                                                                                                                                         | 1. Piped water into dwelling                                                   | 6. Unprotected dug well | 11. Cart with small tank/drum |                             | 7. Protected spring | 12. Tanker-truck |                          |                       |                                                                                |                        |                         |  |                       |                    |                           |
| 1. Piped water into dwelling | 6. Unprotected dug well                                                                                                                                                                                                                                                                                                                                                                                                                                                                                                                                                                                                                                                                                                                                                                                                                                                      | 11. Cart with small tank/drum                                                  |                         |                               |                             |                     |                  |                          |                       |                                                                                |                        |                         |  |                       |                    |                           |
|                              | 7. Protected spring                                                                                                                                                                                                                                                                                                                                                                                                                                                                                                                                                                                                                                                                                                                                                                                                                                                          | 12. Tanker-truck                                                               |                         |                               |                             |                     |                  |                          |                       |                                                                                |                        |                         |  |                       |                    |                           |

|           |                                                                                                                                                                                                                                                                                                                                                                                                                                                                               |                                                                       |                                                                                                             |
|-----------|-------------------------------------------------------------------------------------------------------------------------------------------------------------------------------------------------------------------------------------------------------------------------------------------------------------------------------------------------------------------------------------------------------------------------------------------------------------------------------|-----------------------------------------------------------------------|-------------------------------------------------------------------------------------------------------------|
|           | 2. Piped water to yard/plot<br>3. Public tap/ standpipe<br>4. Tubewell/ bore-hole<br>5. Protected dug well                                                                                                                                                                                                                                                                                                                                                                    | 8. Unprotected spring<br>9. Rainwater collection<br>10. Bottled water | 13. Surface water (river, dam, lake, pond, stream, canal, irrigation channels)<br>14. Other (specify) _____ |
| <b>D3</b> | How long does it take to go there, get water, and come back?<br>#. of minutes _____ ,<br><i>(Ask for his/her best guess, otherwise please write down DK if participant don't know the answer to this question or 0 (zero) if water source is within the premises of the household)</i>                                                                                                                                                                                        |                                                                       |                                                                                                             |
| <b>D4</b> | Do you treat your water in any way to make it safer to drink?                                                                                                                                                                                                                                                                                                                                                                                                                 |                                                                       | 1. Yes      2. No                                                                                           |
| <b>D5</b> | What do you usually do to the water to make it safer to drink?<br>Record all items mentioned                                                                                                                                                                                                                                                                                                                                                                                  |                                                                       |                                                                                                             |
|           | <ul style="list-style-type: none"> <li><input type="radio"/> Boil</li> <li><input type="radio"/> Add bleach/chlorine</li> <li><input type="radio"/> Strain it through a cloth</li> <li><input type="radio"/> Use a water filter (ceramic, sand, composite, etc.)</li> <li><input type="radio"/> Solar disinfection</li> <li><input type="radio"/> Let it stand and settle</li> <li><input type="radio"/> Other (specify)</li> <li><input type="radio"/> Don't Know</li> </ul> |                                                                       |                                                                                                             |
| <b>D6</b> | What kind of toilet facility do members of your household usually use?<br>If "flush" or "pour flush" probe: Where does it Flush/pour flush to:                                                                                                                                                                                                                                                                                                                                |                                                                       |                                                                                                             |

**Section E. HYGIENIC FOOD INTAKE**

*participants 14+ can answer this section questions with the assistance of their guardian*

|           |                                                                                                                             |                                                                                    |
|-----------|-----------------------------------------------------------------------------------------------------------------------------|------------------------------------------------------------------------------------|
| <b>E1</b> | Where do you prepare your food at home?                                                                                     | 1. On the ground<br>2. multi-purpose table<br>3. Table exclusively set for cooking |
| <b>E2</b> | For the following question to be answer think on the last seven prior to this survey                                        |                                                                                    |
| <b>E3</b> | Hand washing after defecation: 1. Yes      2. No<br><i>(practice of mother should be asked in case of younger children)</i> |                                                                                    |

*Please answer the following questions based on what you have done duringp the past 7 days*

|           | Question:                                     | Category              |                       |                       |                       |
|-----------|-----------------------------------------------|-----------------------|-----------------------|-----------------------|-----------------------|
|           |                                               | Never                 | Sometimes             | Most of the time      | Always                |
| <b>E4</b> | Did you get your main meals from home?        | <input type="radio"/> | <input type="radio"/> | <input type="radio"/> | <input type="radio"/> |
| <b>E5</b> | Did you get your main meals from street?      | <input type="radio"/> | <input type="radio"/> | <input type="radio"/> | <input type="radio"/> |
| <b>E6</b> | Did you wash your hands before handling food? | <input type="radio"/> | <input type="radio"/> | <input type="radio"/> | <input type="radio"/> |
| <b>E7</b> | Did you wash your hands before eating food?   | <input type="radio"/> | <input type="radio"/> | <input type="radio"/> | <input type="radio"/> |



|            |                                                                               |                       |                       |                       |                       |
|------------|-------------------------------------------------------------------------------|-----------------------|-----------------------|-----------------------|-----------------------|
| <b>E8</b>  | Did you wash your hands after defecation?                                     | <input type="radio"/> | <input type="radio"/> | <input type="radio"/> | <input type="radio"/> |
| <b>E9</b>  | Was the kitchen which prepared the food you ate, free of insects and rodents? | <input type="radio"/> | <input type="radio"/> | <input type="radio"/> | <input type="radio"/> |
| <b>E10</b> | Was the kitchen which prepared the food you ate, free of insects and rodents? | <input type="radio"/> | <input type="radio"/> | <input type="radio"/> | <input type="radio"/> |
